# Supplementary material for: SNORA71A Promotes Colorectal Cancer Cell Proliferation, Migration, and Invasion
Source: Biomed Res Int. 2020 Oct 5;2020:8284576. doi: 10.1155/2020/8284576 (PMC7559222; doi:10.1155/2020/8284576)
Supplement: Supplementary Materials — The 107 differentially expressed snoRNAs in colorectal cancer tissues compared to normal tissues. [file 8284576.f1.xlsx]

## Sheet: DE snoRNA
Supplementary 1.The 107 differentially expressed snoRNAs in colorectal cancer tissues compared to normal tissues
snoRNA_id	log2FC	Pvalue	FDR	Style	T_1	T_2	T_3	N_1	N_2	N_3	Organization	Locus/host gene2
SNORA37	5.77454	0.000136056	0.00246552	up	20	14	20	0	0	1	Intronic	KIAA1797
SNORA56	3.32859	1.03125e-08	8.89826e-07	up	95	165	75	9	7	16	Intronic	DKC1
SCARNA15	3.27149	2.93359e-10	4.42972e-08	up	332	422	303	32	25	54	Mono	FSD2 complementary
SNORA24	3.24275	0.000733815	0.00726597	up	26	33	13	1	1	5	Intronic	PARP16
SNORA23	3.14912	9.19005e-06	0.000326517	up	1640	2341	4544	305	412	459	Intronic	IPO7
SNORA71A	2.70899	0.00457626	0.0249015	up	9406	14825	12287	441	426	4804	Intronic	AL080249.26
SNORD88B	2.64832	0.00188293	0.0129237	up	35	68	13	4	2	10	Intronic	C19orf48
SNORA10	2.61196	0.00535455	0.0283697	up	4796	2292	4399	247	142	1621	Intronic	RPS2
SNORD88B	2.4979	0.00248639	0.0161482	up	39	53	12	3	3	10	Intronic	C19orf48
SNORA71D	2.37127	0.011078	0.0481375	up	3636	3315	7505	512	282	2509	Intronic	AL080249.26
SNORA23	2.28805	0.000302562	0.00397548	up	518	466	711	118	83	191	Intronic	IPO7
SNORA27	2.28552	7.02078e-05	0.00146226	up	67	88	65	11	20	15	Intronic	RPL21
SNORD18C	2.19826	0.000891728	0.00828622	up	4874	3025	2439	529	282	1368	Mono	Mono:27:AC013471.7
SNORA31	2.19423	0.000552281	0.00595548	up	1165	982	687	78	164	353	Intronic	TPT1
SNORA79	2.18689	2.80633e-05	0.000736967	up	96	120	94	19	26	25	Intronic	GTF2A1
SNORD18C	2.17927	0.00124642	0.00992828	up	4872	2988	2365	532	262	1381	Mono	Mono:27:AC013471.7
SNORA68	2.1074	0.00814501	0.0387369	up	16375	12548	11242	1376	926	6898	Intronic	ANKRD27
SCARNA16	1.9803	1.08566e-05	0.000364299	up	1610	834	690	360	201	227	Intronic	BX648413
SNORD86	1.94393	0.00135923	0.010662	up	357	321	71	59	27	82	Intronic	NOL5A
SNORA50	1.93172	3.71403e-06	0.00017256	up	1238	1685	1067	337	278	434	Intronic	CNOT1
SNORA52	1.92716	0.00144966	0.0110835	up	88	65	54	14	12	28	Intronic	RPLP2
SNORD14B	1.90931	0.000994606	0.00883444	up	54	80	52	26	13	12	Intronic	HSPA8
SNORA74B	1.90157	8.87899e-09	8.89826e-07	up	3494	2651	1633	643	714	651	Intronic	ATP6V0E
SNORD49B	1.89237	0.000287399	0.00397548	up	52096	35547	21498	7734	5313	14637	Intronic	C17orf45
SNORA74A	1.64981	0.0099895	0.0450273	up	234	159	58	19	39	68	Intronic	MATR3
SCARNA1	1.61394	0.000105175	0.00204921	up	208	150	103	51	43	53	Intronic	PPP1R8
SNORD78	1.61006	0.00399595	0.0227775	up	22331	28110	8095	3884	3389	9589	Intronic	GAS5
SNORD28	1.60703	5.0663e-05	0.00113335	up	841	929	414	268	144	267	Intronic	SNHG1
SNORD18B	1.56704	2.3314e-05	0.000670555	up	1382	1032	765	443	295	335	Intronic	RPL4
SNORA1	1.54733	0.00714797	0.0353883	up	104	114	44	22	16	44	Intronic	JOSD3
SNORA3	1.51413	0.0050716	0.0273504	up	6152	5937	5811	1647	1582	3311	Intronic	RPL27A
SNORD14B	1.50452	0.00876783	0.0401194	up	354	390	347	195	162	57	Intronic	HSPA8
SNORA75	1.47918	0.00253964	0.0163185	up	165	123	61	26	46	44	Intronic	NCL
SNORD18B	1.4064	0.00020077	0.00327743	up	1331	1012	809	466	334	401	Intronic	RPL4
SNORD4B	1.40467	3.23766e-06	0.000162962	up	8180	7049	4128	2703	2092	2310	Intronic	RPL23A
SNORD6	1.38483	0.000138787	0.00246552	up	31727	43716	15701	11988	7889	12498	Intronic	JOSD3
SNORD6	1.38064	0.000144047	0.00248583	up	31583	43934	15532	12075	7917	12402	Intronic	JOSD3
SNORD4B	1.37055	2.86911e-06	0.00015754	up	8114	7169	3972	2647	2141	2391	Intronic	RPL23A
SNORA62	1.34715	0.000152997	0.00256695	up	492	585	286	171	140	202	Intronic	RPSA
SNORA62	1.32867	0.00106614	0.00894372	up	569	518	305	198	120	220	Intronic	RPSA
SNORA53	1.23319	0.000274631	0.00394946	up	293	270	157	108	101	89	Intronic	SLC25A3
SNORA65	1.13548	0.00933798	0.0424071	up	477	418	247	126	144	227	Intronic	RPL12
SNORD22	1.09574	0.000251157	0.00379247	up	1260	1364	628	602	441	413	Intronic	SNHG1
SNORD37	1.08093	0.00295442	0.018025	up	17486	15325	11876	8680	6114	6744	Intronic	EEF2
SNORD5	1.07482	0.00733515	0.0354434	up	14148	21776	10477	6581	5614	9056	Intronic	JOSD3
SNORD113-3	-1.04451	0.00859794	0.0396693	down	95	94	68	222	158	156	Poly	SNORD113@,SNORD114@
SNORD94	-1.14482	0.00328755	0.0198568	down	2354	3540	1140	5079	5976	3305	Intronic	PTCD3
SNORD36C	-1.17965	0.00675089	0.0337193	down	323	196	133	684	426	338	Intronic	RPL7A
SNORD66	-1.27899	0.00101427	0.00887854	down	1797	1501	839	4445	3298	2053	Intronic	EIF4G1
SNORD114-22	-1.32592	0.00541158	0.0284226	down	410	736	568	1710	1437	1428	Poly	SNORD113@,SNORD114@
SNORD114-11	-1.34713	0.00191147	0.0129722	down	44	70	36	143	100	131	Poly	SNORD113@,SNORD114@
SNORD45B	-1.39422	3.62481e-05	0.000883763	down	1809	2361	785	4769	3185	4045	Intronic	RABGGTB
SNORD114-22	-1.43809	0.00366056	0.0214658	down	368	661	547	1711	1474	1419	Poly	SNORD113@,SNORD114@
SNORD84	-1.44402	0.00165486	0.0120006	down	4991	5757	2128	15371	12313	5345	Intronic	BAT1
SNORD80	-1.51919	3.65796e-05	0.000883763	down	63	74	39	160	168	159	Intronic	GAS5
SNORD68	-1.54523	0.00860376	0.0396693	down	2669	1811	676	6401	5851	1611	Intronic	RPL13
SNORD114-1	-1.64717	0.00124925	0.00992828	down	1237	1495	1469	6956	4326	3214	Poly	SNORD113@,SNORD114@
SNORD114-3	-1.65136	0.000396095	0.00479676	down	1326	2361	1421	7495	5616	3467	Poly	SNORD113@,SNORD114@
SNORD114-1	-1.65446	0.000956757	0.00862509	down	1230	1546	1426	6941	4316	3193	Poly	SNORD113@,SNORD114@
SCARNA9	-1.65806	0.00187604	0.0129237	down	467	808	172	1888	1565	647	Intronic	KIAA1731
SNORD114-3	-1.65892	0.000293629	0.00397548	down	1355	2350	1420	7540	5601	3563	Poly	SNORD113@,SNORD114@
SNORD113-6	-1.6592	0.00454333	0.0249015	down	179	577	252	1330	1318	539	Poly	SNORD113@,SNORD114@
SNORD87	-1.67816	0.00293329	0.018025	down	168	164	114	768	517	184	Mono	Mono:295:AC011031.12
SNORD59A	-1.68165	0.00271145	0.0170595	down	58081	58817	25261	263925	122503	55925	Intronic	ATP5B
SNORD71	-1.6824	2.31885e-07	1.75073e-05	down	31518	31610	13155	101936	67457	61626	Intronic	AP1G1
SNORD36C	-1.69635	0.000271733	0.00394946	down	216	154	51	586	358	299	Intronic	RPL7A
SNORD114-14	-1.70075	0.000761411	0.00740925	down	222	363	298	1268	722	1086	Poly	SNORD113@,SNORD114@
SNORD116-15	-1.72044	0.00675502	0.0337193	down	2169	4378	1324	12801	9501	2277	Intronic	hmm16326423
SNORD116-15	-1.73591	0.00529251	0.0282892	down	2144	4330	1314	12725	9441	2413	Intronic	hmm16326423
SNORD95	-1.73601	0.00723974	0.0353998	down	2047	1992	448	6120	5900	1286	Intronic	GNB2L1
SNORD113-6	-1.7542	0.00118194	0.00972318	down	184	523	248	1293	1311	640	Poly	SNORD113@,SNORD114@
SNORD114-28	-1.76816	0.000373694	0.00470232	down	172	388	217	1190	934	597	Poly	SNORD113@,SNORD114@
SNORD114-28	-1.7939	0.000461039	0.00525411	down	162	360	224	1189	924	594	Poly	SNORD113@,SNORD114@
SNORD81L4	-1.80441	0.00726751	0.0353998	down	337	314	64	1128	878	211	Mono	Mono:252:AC018474.31
SCARNA9	-1.80525	0.00119125	0.00972318	down	428	675	156	1851	1593	537	Intronic	KIAA1731
SNORD114-14	-1.82438	6.60784e-05	0.00142541	down	233	360	263	1260	787	1119	Poly	SNORD113@,SNORD114@
SNORD114-23	-1.83991	0.000111885	0.00211183	down	125	312	148	890	663	543	Poly	SNORD113@,SNORD114@
SNORD113-8	-1.87082	0.00142376	0.011025	down	17	42	25	132	120	64	Poly	SNORD113@,SNORD114@
SNORD104	-1.87434	4.43195e-05	0.00102958	down	2481	1300	808	6385	6326	3318	Poly	Poly:10:AC025362.12
SNORD32A	-1.8871	4.25041e-06	0.000183375	down	451	719	230	2230	1103	1492	Intronic	RPL13A
SNORD113-5	-1.90377	0.000103996	0.00204921	down	160	308	220	1143	718	860	Poly	SNORD113@,SNORD114@
SNORD114-26	-1.92414	6.05487e-06	0.000243809	down	203	379	202	1306	894	800	Poly	SNORD113@,SNORD114@
SNORD113-5	-1.97095	0.000251151	0.00379247	down	131	298	216	1238	717	762	Poly	SNORD113@,SNORD114@
SNORD114-17	-1.97982	0.000772819	0.00740925	down	94	129	91	607	531	160	Poly	SNORD113@,SNORD114@
SNORD116-6	-1.99369	0.00414338	0.0233888	down	937	1849	417	6361	4465	873	Intronic	hmm16326423
SNORD114-17	-1.99409	0.000562024	0.00595548	down	87	155	93	616	577	185	Poly	SNORD113@,SNORD114@
SNORD116-6	-2.00065	0.00420188	0.0234994	down	940	1771	410	6272	4381	826	Intronic	hmm16326423
SNORD114-26	-2.01776	2.40868e-06	0.000153958	down	182	371	189	1247	897	866	Poly	SNORD113@,SNORD114@
SNORD113-8	-2.02995	0.000250913	0.00379247	down	19	34	22	132	120	62	Poly	SNORD113@,SNORD114@
SNORD114-23	-2.04785	2.631e-05	0.00072233	down	99	246	130	832	636	529	Poly	SNORD113@,SNORD114@
SNORD116-1	-2.05397	0.00364178	0.0214658	down	1625	3692	796	12581	8932	1721	Poly	hmm16326423
SNORD116-1	-2.05832	0.00392912	0.0227775	down	1569	3828	762	12665	8895	1754	Poly	hmm16326423
SNORD116-8	-2.05885	0.00200337	0.0134448	down	3303	6147	2155	24917	18198	3596	Intronic	hmm16326423
SNORD116-9	-2.07596	0.00161631	0.0120006	down	5922	10961	3639	48644	27734	6977	Intronic	hmm16326423
SNORD116-8	-2.09061	0.00183116	0.0128607	down	3341	6015	2057	24794	18456	3483	Intronic	hmm16326423
SNORD116-9	-2.09706	0.00155351	0.011729	down	5888	10829	3599	49165	27725	6873	Intronic	hmm16326423
SNORD116-2	-2.13481	0.00237478	0.0155909	down	1543	3110	721	12048	8139	1561	Poly	hmm16326423
SNORD116-2	-2.17588	0.00182844	0.0128607	down	1611	3023	689	12266	8213	1605	Poly	hmm16326423
SNORD64	-2.22839	0.00447821	0.024815	down	9802	9562	4143	53728	48425	4059	Poly	SNRPN partial-1
SNORD113-4	-2.34884	0.000923508	0.0084515	down	6	13	7	62	50	21	Poly	SNORD113@,SNORD114@
SNORD107	-2.35208	0.00268426	0.0170595	down	654	698	200	4231	2809	314	Poly	SNRPN partial-1
SNORD93	-2.50374	0.00106245	0.00894372	down	1198	368	237	5408	3520	703	Mono	Mono:184:AC005682.2
SNORD114-15	-2.53787	0.00581156	0.0297473	down	15	16	0	85	40	27	Poly	SNORD113@,SNORD114@
SNORD113-4	-2.54302	0.000397083	0.00479676	down	8	18	3	78	50	26	Poly	SNORD113@,SNORD114@
SNORD48	-2.54338	0.00105465	0.00894372	down	251	354	106	1827	1870	169	Intronic	C6orf48
SNORD114-15	-2.69688	0.00286031	0.0178106	down	8	17	0	67	43	26	Poly	SNORD113@,SNORD114@
SNORD112	-3.53228	1.34517e-05	0.000418938	down	11	26	11	281	241	31	Intronic	MEG8
